# Supplementary material for: Global Downscaling of Remotely-Sensed Soil Moisture using Neural Networks
Source: Copernicus journal article supplement (doi:10.5194/hess-2017-680), 2018-02-08
Supplement: Supplementary file 1 [file hess-2017-680-supplement.pdf]

# Global Downscaling of Remotely-Sensed Soil Moisture using Neural Networks

Seyed Hamed Alemohammad<sup>1,2</sup>, Jana Kolassa<sup>3,4</sup>, Catherine Prigent<sup>1,2,5</sup>, Filipe Aires<sup>1,2,5</sup>, Pierre Gentine<sup>1,2,6</sup>

<sup>1</sup>Department of Earth and Environmental Engineering, Columbia University

5 <sup>2</sup>Columbia Water Center, Columbia University

<sup>3</sup>Universities Space Research Association, Columbia, MD

<sup>4</sup>Global Modelling and Assimilation Office, NASA Goddard Space Flight Center, Greenbelt, MD

<sup>5</sup>Observatoire de Paris

<sup>6</sup>Earth Institute, Columbia University

10 *Correspondence to:* Pierre Gentine (pg2328@columbia.edu)

## Supplementary Materials

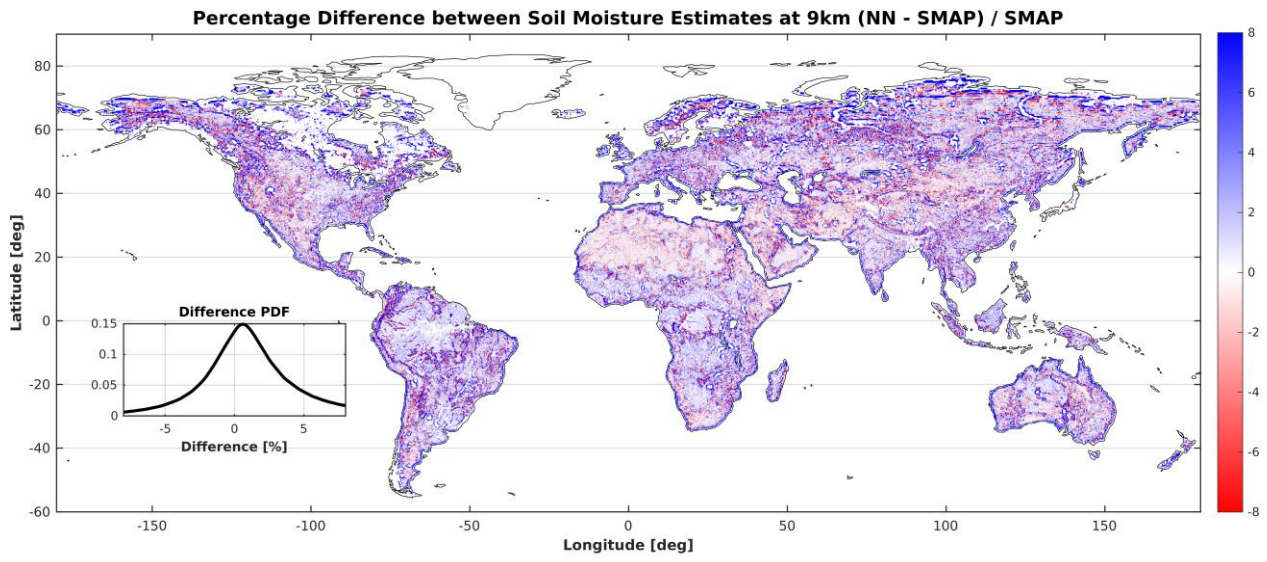

Figure S1- Percentage bias between the SMAP 9km soil moisture estimates and NN 9km estimates. White regions indicate no data.

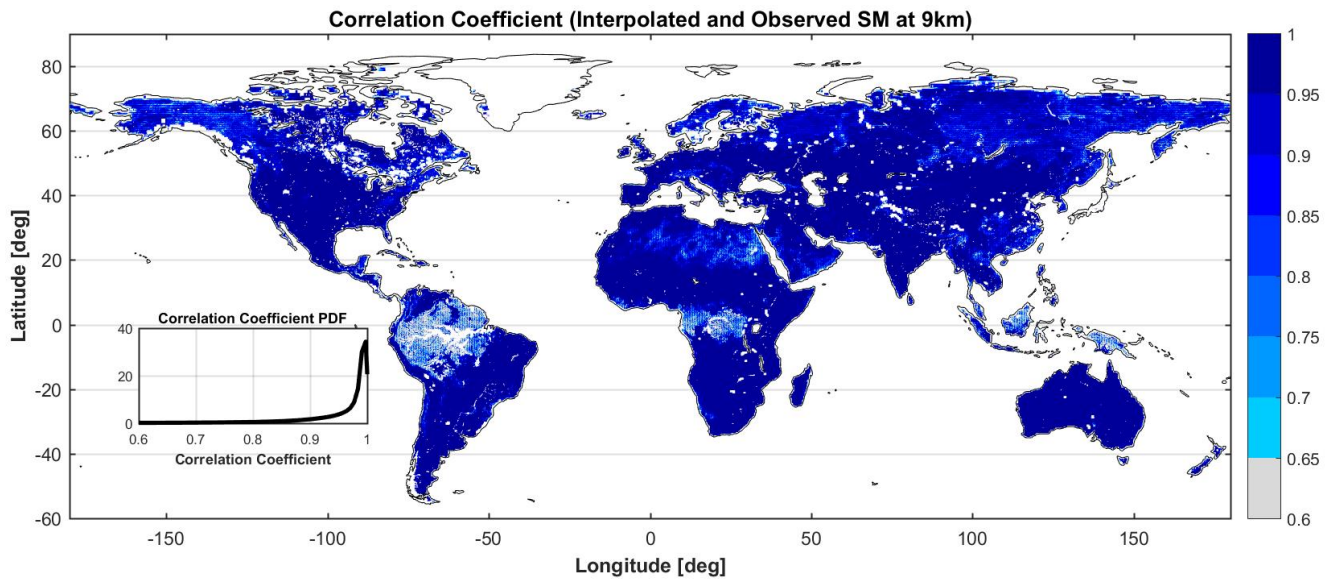

Figure S2- Correlation coefficient ( $R^2$ ) between SMAP observed soil moisture at 9km and Interpolated soil moisture at 9km. White regions indicate no data.

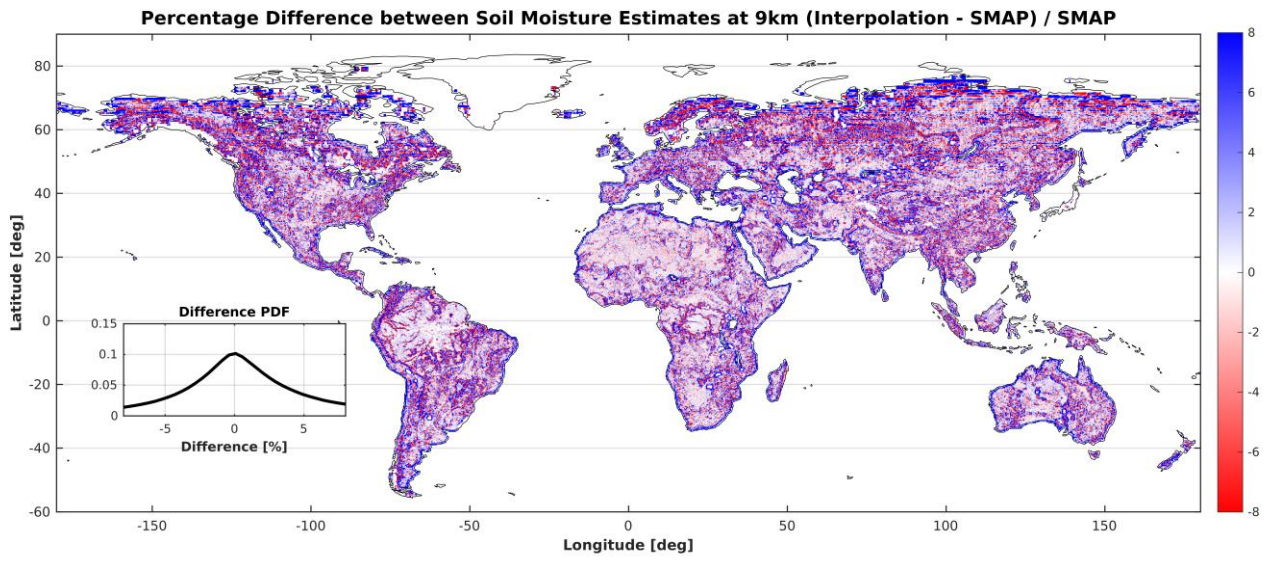

Figure S3- Percentage bias between the SMAP 9km soil moisture estimates and Interpolated 9km estimates. White regions indicate no data.

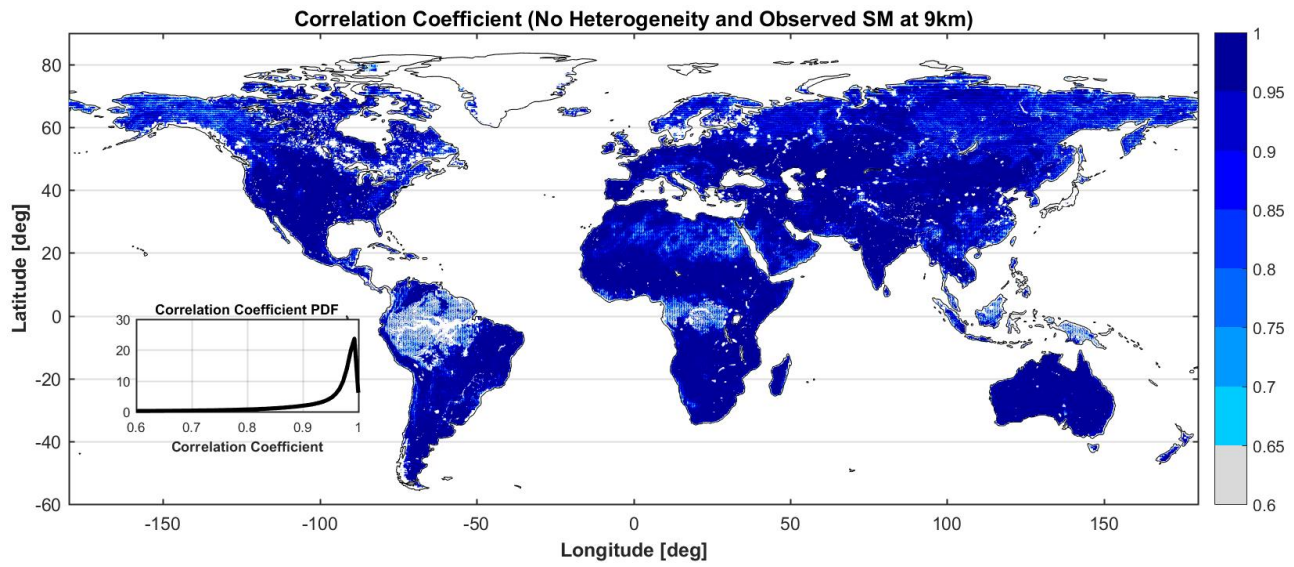

**Figure S4- Correlation coefficient ( $R^2$ ) between SMAP observed soil moisture at 9km and No Heterogeneity soil moisture estimates at 9km. White regions indicate no data.**

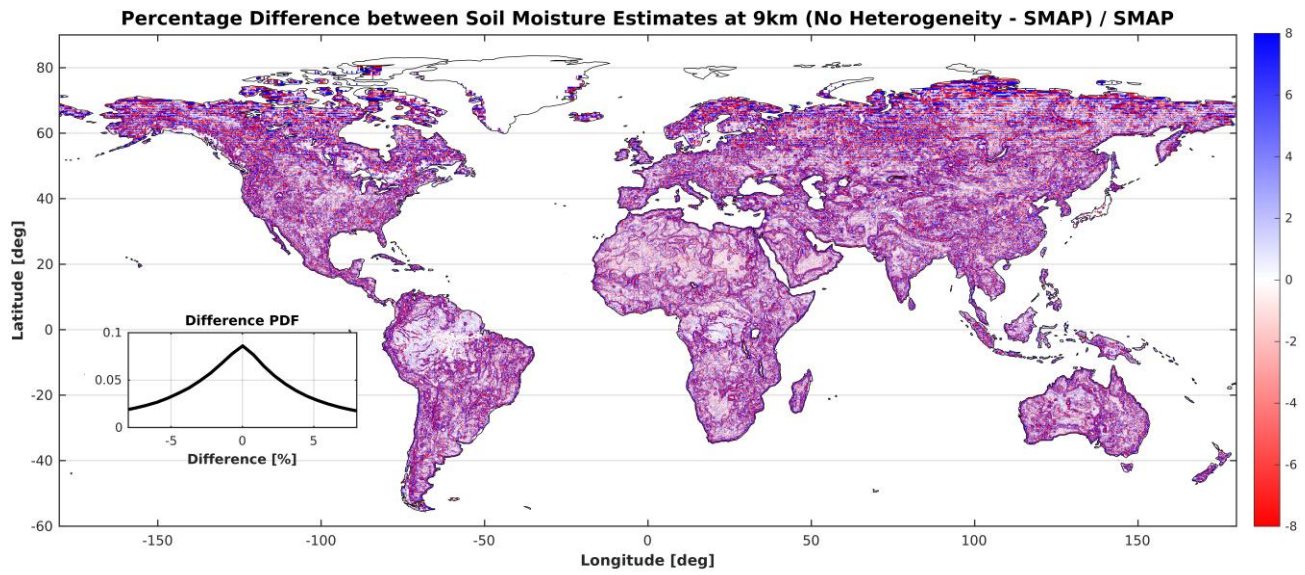

Figure S5- Percentage bias between the SMAP 9km soil moisture estimates and No Heterogeneity 9km estimates. White regions indicate no data.

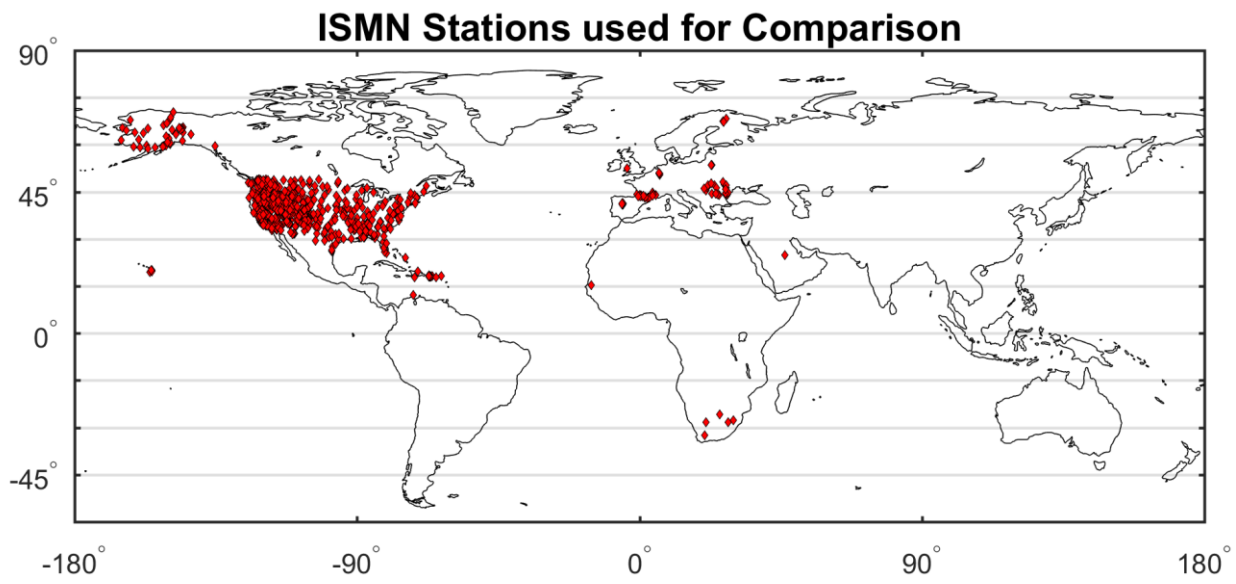

**Figure S6- Location of each ISMN station used for comparison against downscaled soil moisture estimates**
